# Supplementary material for: Modeling of Human Rabies Cases in Brazil in Different Future Global Warming Scenarios
Source: MDPI journal article supplement (doi:10.3390/ijerph21020212), 2024-02-11
Supplement: s1 [file s1]

Modeling of human rabies cases in Brazil in different future global warming scenarios

Supplementary materials

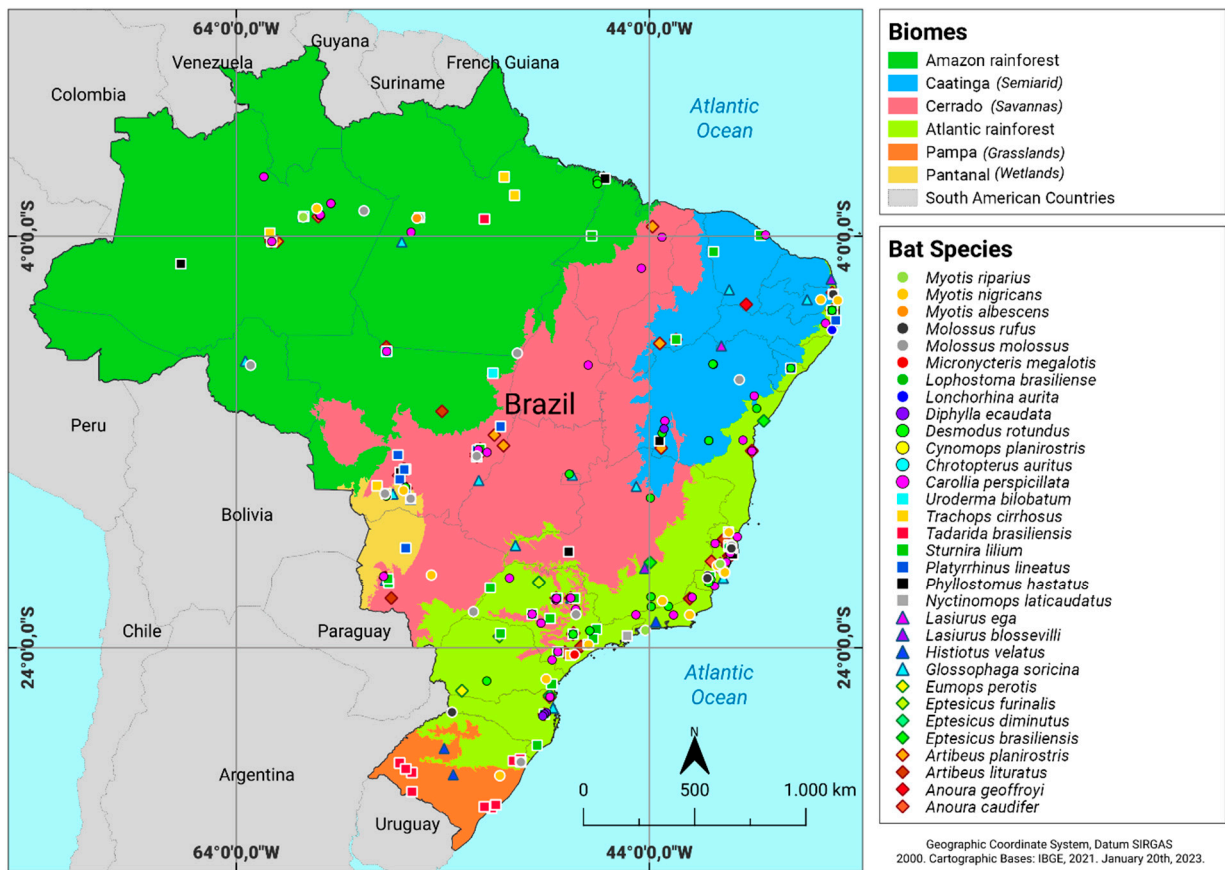

**Figure S1.** Brazilian biomes and respective bat species distribution that tested positive for rabies.
